# Supplementary material for: Vesicle formation induced by thermal fluctuations
Source: Royal Society of Chemistry journal article supplement (doi:10.1039/d2sm01167k), 2023-01-01
Supplement: d2sm01167k1.pdf [file d2sm01167k1.pdf]

# Vesicle formation induced by thermal fluctuations

Andreu F. Gallen,<sup>\*,†</sup> J. Roberto Romero-Arias,<sup>‡</sup> Rafael A. Barrio,<sup>¶</sup> and Aurora  
Hernandez-Machado<sup>†,§</sup>

<sup>†</sup>*Departament Física de la Matèria Condensada, Universitat de Barcelona, E-08028  
Barcelona, Spain*

<sup>‡</sup>*Instituto de Investigaciones en Matemáticas Aplicadas y en Sistemas, Universidad  
Nacional Autónoma de México, 01000 Ciudad de México, Mexico.*

<sup>¶</sup>*Instituto de Física, U.N.A.M., 01000, Ap. Postal 101000, México D.F., México*

<sup>§</sup>*Institute of Nanoscience and Nanotechnology (IN2UB), 08028 Barcelona, Spain*

E-mail: fdzgallen@gmail.com

## Supporting Information Available

### Appendix

#### Obtaining the phase field model

To write the Canham-Helfrich free energy equation in terms of a phase field order parameter  $\phi$  we will have to first define the total and Gaussian curvatures. Having the surface normal vector  $\hat{n}$  one can define then the curvature tensor

$$Q_{ij} = \nabla_i n_j, \quad (1)$$

as the normal vector  $n$  changes along the surface are directly related to the curvature of a surface.

Now, using the curvature tensor  $Q$  we can write the curvature  $C$  and the Gaussian curvature  $K$ . The determinant of the curvature tensor  $Q$  is always zero, but using its trace we can write the curvature<sup>1</sup>

$$C = \text{tr}[Q]. \quad (2)$$

The Gaussian curvature is a bit more complex being

$$K = \sum_{i,j} \left[ \left( Q_{ii}Q_{jj} - Q_{ij}^2 \right) \frac{1 - \delta_{ij}}{2} \right]. \quad (3)$$

The expression is focused on the non-diagonal elements of the tensor because it is related to the overall shape that the surface takes around a point and whether is plane, curved, or presents a saddle-splay shape.

To compute the simulations with a simple model that avoid the need of tracking the interface position we will use a phase field model. Therefore, we define an order parameter  $\phi(\mathbf{x})$  that represents if the volume of fluid at the point  $\mathbf{x}$  corresponds to either external or internal fluid to the vesicle. In this article, we choose the values  $\phi(\mathbf{x}) = +1$  for the internal fluid of the vesicle and  $\phi(\mathbf{x}) = -1$  for the external fluid. With this order parameter, we can write the curvature parameters as<sup>2</sup>

$$C[\phi] = \frac{\sqrt{2}}{\epsilon(1 - \phi^2)} \left( -\phi + \phi^3 - \epsilon^2 \nabla^2 \phi \right), \quad (4)$$

and, to compute  $K$ , we will be using the curvature tensor written for a phase field

$$Q_{ij} = \frac{\sqrt{2}\epsilon}{1 - \phi^2} \left[ \partial_i \partial_j \phi + \frac{2\phi}{1 - \phi^2} \partial_i \phi \partial_j \phi \right], \quad (5)$$

where  $\partial_i$  refers to a derivative and  $i, j$  can be any of our cartesian coordinates  $(x, y, z)$ . We will be computing the Canham-Helfrich free energy as a phase field which we will split into two different contributions  $F = F_{C_0} + F_G$ , which consists of the Curvature energy term and the Gaussian curvature term.

The minimisation of the Canham-Helfrich free energy is computed numerically in this scheme. In this methodology the main goal is to change from a surface energy to a volumetric energy by defining an order parameter. For this we use a surface differential expressed like

$$dS = \frac{3}{4\sqrt{2}\epsilon} (1 - \phi^2)^2 dV. \quad (6)$$

### Obtain $T_1$ and $T_2$

The Gaussian energy term written as a phase field model involve many derivatives of the order parameter  $\phi$ . For simplicity, we have called them  $T_1$  and  $T_2$ , here we have written explicitly as introduced in.<sup>3</sup> The various derivatives of  $\phi$  are written for simplicity as  $\phi_i$  where  $i$  is either  $x$   $y$   $z$

$$T_1 = \phi_{xx}\phi_{yy} + \phi_{xx}\phi_{zz} + \phi_{yy}\phi_{zz} - (\phi_{xy})^2 - (\phi_{xz})^2 - (\phi_{yz})^2, \quad (7)$$

and

$$T_2 = \phi_{xx}(\phi_y)^2 + \phi_{xx}(\phi_z)^2 + \phi_{yy}(\phi_x)^2 + \phi_{yy}(\phi_z)^2 + \phi_{zz}(\phi_x)^2 + \phi_{zz}(\phi_y)^2 \\ - 2\phi_x\phi_y\phi_{xy} - 2\phi_x\phi_z\phi_{xz} - 2\phi_y\phi_z\phi_{yz}. \quad (8)$$

## References

- (1) Campelo, F. *Shapes in cells. Dynamic instabilities, morphology, and curvature in biological membranes.*; Universitat de Barcelona: Spain, 2008.
- (2) Campelo, F.; Hernandez-Machado, A. Dynamic model and stationary shapes of fluid vesicles. *The European Physical Journal E* **2006**, *20*, 37–45.
- (3) Rueda-Contreras, M. D.; Gallen, A. F.; Romero-Arias, J. R.; Hernandez-Machado, A.;

Barrio, R. A. On Gaussian curvature and membrane fission. *Scientific Reports* **2021**, *11*, 1–10.
